# Supplementary material for: Molecular Role of Ca2+ and Hard Divalent Metal Cations on Accelerated Fibrillation and Interfibrillar Aggregation of α-Synuclein
Source: PubMed Central journal article supplement (PMC5789889; doi:10.1038/s41598-018-20320-5), 2018-01-30
Supplement: 41598_2018_20320_MOESM1_ESM.pdf [file 41598_2018_20320_MOESM1_ESM.pdf]

# Supplementary Information

## Molecular Role of $\text{Ca}^{2+}$ and Hard Divalent Metal Cations on Accelerated Fibrillation and Interfibrillar Aggregation of $\alpha$ -Synuclein

*Jong Yoon Han, Tae Su Choi, and Hugh I. Kim\**

Department of Chemistry, Korea University, Seoul 02841, Republic of Korea

\* To whom correspondence should be addressed: E-mail: [hughkim@korea.ac.kr](mailto:hughkim@korea.ac.kr)

## Materials and Methods

**Preparation of  $\alpha$ Syn samples.** Alpha-synuclein ( $\alpha$ Syn), which was purchased from rPeptide (Bogart, GA, USA), was suspended at 1 mg/mL in water (the protein powder contains 20 mM Tris-HCl 100 mM NaCl, pH 7.4), and the buffer was exchanged to 20 mM Tris-HCl (pH 7.4) by centrifugation using a Amicon® 10K centrifugal filter. To remove possible preformed aggregates, the  $\alpha$ Syn solution was centrifuged at  $18,000 \times g$  for 10 min, and the supernatant was taken from the solution. The concentration of the  $\alpha$ Syn stock solution was directly estimated using the molar extinction coefficient,  $\epsilon_{280} = 5,960 \text{ M}^{-1} \text{ cm}^{-1}$ . For the preparation of the fibrils and the aggregates formed with  $\text{Ca}^{2+}$  mediation, 30  $\mu\text{M}$  of freshly prepared  $\alpha$ Syn, in the presence or absence of 1.5 mM calcium chloride ( $\text{CaCl}_2$ ) (Sigma-Aldrich, St Louis, MO, USA) was added (total volume of 250  $\mu\text{L}$ ) to 0.3-mL borosilicate glass vials with a V-shaped bottom (Wheaton, USA, Millville, NJ, cat. no. 03-410-020). For all sample preparation, 1 M  $\text{CaCl}_2$  stock in water was used, of which the concentration was determined through titration against ethylenediaminetetraacetic acid (EDTA) (Sigma-Aldrich, St Louis, MO, USA).<sup>1</sup> The samples in glass vial were incubated at 37 °C with agitation at 200 rpm.

For small-angle x-ray scattering (SAXS) experiment, rigorous separation was performed in order to obtain absolutely pure monomeric protein. Because the X-ray scattering intensity is proportional to the square of the molecular weight ( $I(0) \propto N \cdot m^2$ , where  $I(0)$  is the extrapolated scattering intensity at an angle of zero,  $N$  is the number of particles, and  $m$  is the number of electrons of the particle),<sup>2</sup> even a trace amount of protein oligomers has significant influence on SAXS scattering profile of monomers. Therefore, the  $\alpha$ Syn solution was filtered using a Amicon® 100K centrifugal filter (Millipore, Eschborn, Germany) to remove small oligomers that possibly coexisted.<sup>3,4</sup> Although  $\alpha$ Syn has a low molecular weight (14 kDa),  $\alpha$ Syn could not be filtered using

30K and 50K filters, possibly because  $\alpha$ Syn is intrinsically disordered and has large  $R_g$  values of  $\sim 31.8 \pm 0.7 \text{ \AA}$  (Fig. 4B) comparable to that of human serum albumin (66 kDa protein,  $R_g$  values of  $\sim 30.4 \pm 0.5 \text{ \AA}$ ).<sup>5</sup> After 100K filtration, the filtrate was concentrated using a 10K centrifugal filter, and used for the SAXS experiment. We confirmed that this additional step helped to obtain SAXS profiles with reduction of trace amounts of oligomers. However, no significant difference was observed in the aggregation kinetics between the 100K-filtered  $\alpha$ Syn and unfiltered  $\alpha$ Syn (Supplementary Fig. 9), indicating that the amount of  $\alpha$ Syn oligomers included in the 100K-filtered samples was influential in the SAXS experiment but not sufficiently significant to affect the overall aggregation kinetics.

**Thioflavin T (ThT) fluorescence assay.** Thioflavin T (ThT) was purchased from Sigma-Aldrich (St Louis, MO, USA). The ThT solution was prepared at a concentration of  $10 \text{ \mu M}$  in 20 mM Tris-HCl (pH 7.4). At every 6 hours or 12 hours during incubation, the  $\alpha$ Syn samples were dispersed by pipetting (5–10 times) and 3  $\mu$ L aliquots were collected from the samples. Then, the 3  $\mu$ L aliquots were mixed with 147  $\mu$ L of ThT solution, and fluorescence was measured (ex: 446 nm, em: 482 nm) using a fluorescence spectrometer (FluoroMate FS-2, Scinco, Seoul, Korea). We measured the fluorescence intensity of 3  $\mu$ L of Tris-HCl mixed with 147  $\mu$ L of ThT solution, and subtracted the intensity as a baseline from that of the  $\alpha$ Syn sample. After the measurement of the ThT fluorescence intensity, the data points obtained from each sample were fitted by using the following sigmoidal function (Eq. (1)).<sup>6,7</sup>

$$F(t) = r_1 + \frac{r_2 - r_1}{1 + e^{-(t-t_0)/\tau}} \quad (1)$$

Using the fitted function, the half time ( $t_{1/2}$ ) was determined when the intensity of  $F(t)$  was equal to  $r_2/2$ .

**Transmission electron microscopy (TEM).**  $\alpha$ Syn solutions (30  $\mu$ M) incubated with and without 1.5 mM  $\text{Ca}^{2+}$  for 7 days were dispersed by pipetting (5–10 times). Then, we took 5  $\mu$ L of the suspension and mixed it with 5  $\mu$ L water. 5  $\mu$ L of the two-fold diluted sample was spotted on a TEM grid for 3 min, and removed. Then, 5  $\mu$ L of 0.5% uranyl acetate solution was spotted for 1 min, and removed immediately. The TEM grids were dried under ambient conditions. The analysis was performed using a field-emission transmission electron microscope (Tecnai G2 F30ST, FEI co., USA) at the Korea Basic Science Institute (KBSI) in Seoul, Republic of Korea.

**Circular dichroism (CD) spectroscopy.** 30  $\mu$ M  $\alpha$ Syn samples in 20 mM Tris-HCl buffer with and without 1.5 mM  $\text{CaCl}_2$  were incubated at 37  $^\circ\text{C}$  with agitation at 200 rpm for 0 h, 12 h, 24 h, and 7 d. At each time point, the incubated sample was fully dispersed by pipetting and 100  $\mu$ L of the sample was collected from the vial. The sample was diluted two-fold by using 20 mM Tris-HCl. Then, the two-fold diluted  $\alpha$ Syn samples were dispersed again and immediately inserted into a cuvette with a path length of 0.1 cm (Starna, Atascadero, CA, USA), and CD was measured on a J-1100 CD spectrometer (Jasco, Tokyo, Japan). The spectra were obtained from 195 to 250 nm at a scan speed of 50 nm/min. All spectra were obtained by averaging spectra of five replicate scans.

**Infrared (IR) spectroscopy.** All incubated  $\alpha$ Syn samples (30  $\mu$ M  $\alpha$ Syn with and without 1.5 mM  $\text{CaCl}_2$ ) were concentrated using 100K centrifugal filters before subjecting to IR spectroscopy. The monomeric  $\alpha$ Syn sample was concentrated using 10K centrifugal filter. The concentrated  $\alpha$ Syn samples were dropped onto calcium fluoride windows, and dried at 37  $^\circ\text{C}$ . Then, the samples were analyzed using a Bruker Alpha Fourier transform infrared (FTIR) spectrometer (Bruker Optik GmbH, Ettlingen, Germany) with a resolution of 4  $\text{cm}^{-1}$ . For all IR absorbance spectra, the linear baseline between the spectrum point of 1700 and 1600  $\text{cm}^{-1}$  was subtracted from the spectra, and

the spectra were normalized to an identical area between the spectra and baseline within 1600~1700  $\text{cm}^{-1}$ .

**Small-angle X-ray scattering (SAXS).** The SAXS experiments were performed at 4C SAXS II beamline of the Pohang Accelerator Laboratory (PAL). The sample-to-detector distance was set to 2 m, and all experiments were performed at 20 °C.  $\alpha$ Syn solution (>300  $\mu\text{M}$ ) in 20 mM Tris-HCl buffer (pH 7.4) was freshly prepared following the sample preparation method described above, and placed at a temperature of 4 °C. The  $\alpha$ Syn solution was used within 30 minutes for SAXS experiments because  $\alpha$ Syn started to form aggregates after longer storage times. For the measurements, 200  $\mu\text{M}$   $\alpha$ Syn solution (2.89 mg/mL) in the presence and absence of  $\text{CaCl}_2$  was prepared. Scattering profiles were recorded six times for 5 s, and averaged. The values of the radius of gyration ( $R_g$ ) of  $\alpha$ Syn were estimated using the Guinier relationship.<sup>2</sup> All the scattering profiles that were used for the analysis were confirmed not to include aggregates in the solution using the Eq. (2).<sup>8</sup>

$$MW_p = \frac{I(0)_p}{c_p} \frac{MW_{st}}{I(0)_{st}/c_{st}} \quad (2)$$

where  $I(0)$  is the extrapolated scattering intensity at zero angle,  $c$  is the protein concentration in mg/ml, and  $p$  and  $st$  denote protein and standard, respectively. Using  $\text{Ca}^{2+}$ -free  $\alpha$ Syn as the standard, the molecular weight (MW) of  $\alpha$ Syn in the presence of  $\text{Ca}^{2+}$  could be estimated. The similar values of  $I(0)$  of  $\text{Ca}^{2+}$ -free  $\alpha$ Syn and  $\alpha$ Syn with different  $\text{Ca}^{2+}$  concentrations indicated that neither was more aggregated than the other (Supplementary Fig. 3)

**Generation of random  $\alpha$ Syn pool.** At pH 7.4,  $\alpha$ Syn is likely to be present in the  $-9$  charge state. For the generation of the  $-9$  charge state, all lysine (Lys) residues and N-terminus were protonated, and all glutamic acid (Glu), aspartic acid (Asp) residues, and C-terminus were deprotonated. A

previously reported structure of micelle-bound  $\alpha$ Syn (pdb code 1XQ8) was used for molecular dynamics (MD) simulation using GROMACS 4.5.5.<sup>9</sup>  $\alpha$ Syn was modeled using the AMBER-99SB-ILDN force field,<sup>10</sup> and LINCS<sup>11</sup> was used for constraining all bonds. To remove the abundant helical structures in micelle-bound  $\alpha$ Syn (1XQ8), MD simulation was performed for 1 ns at 460 K using a generalized Born implicit solvent model.<sup>12</sup> After MD simulation for 1 ns, it was confirmed that most of the helical structures of  $\alpha$ Syn became random coil structures. For the efficient modeling of  $\alpha$ Syn structures in solution using the prepared initial  $\alpha$ Syn structure, replica-exchange molecular dynamics (REMD) simulation was performed.<sup>13</sup> For REMD simulation, a generalized Born implicit solvent model and five replicas at 430, 445, 460, 470, and 490 K were used (average exchange probability of  $\sim 0.15$ ). The systems were independently equilibrated at each temperature for 1 ns, and then, subjected to REMD simulations with exchange attempted at intervals of 2 ps. Each replica was simulated for 20 ns, and hence, the total simulation time was 100 ns. Then, 2,000 structures were extracted at each temperature (10,000 in total), and all the structures collectively served as a random pool to search for structures in solution.

**Ensemble optimization method (EOM).** Ten thousand  $\alpha$ Syn models were converted into theoretical SAXS profiles, and the best ensembles that matched the experimental profiles were sought using the program GAJOE<sup>14,15</sup> in the program suite ATSAS 2.7.0.<sup>16</sup> Fifty ensembles, fifty curves per ensemble (fixed), and one hundred genetic algorithm repetitions were used for our EOM analysis. For the optimization of an ensemble using experimental  $\alpha$ Syn profiles in the presence of  $\text{Ca}^{2+}$ , the same  $\alpha$ Syn REMD pool was used, and it was confirmed that the theoretical SAXS profiles were not changed after the modeling of binding of four  $\text{Ca}^{2+}$  ions to the structures (Supplementary Fig. 10). For the generation of  $\text{Ca}^{2+}$ -bound structures, four  $\text{Ca}^{2+}$  ions were added near the amino acid residues 114-115 (ED), 119-123 (DPDNE), 130-131 (EE), and 137-139 (EPE). Then, energy

minimization was performed with distance restraint between  $\text{Ca}^{2+}$  and two proximate oxygen atoms in the carboxylate ion using GROMACS 4.5.5.<sup>9</sup> The distance restraint was described using piecewise harmonic potential with a force constant of  $k=50 \text{ kJ mol}^{-1} \text{ nm}^{-1}$  at the distance lower than  $2.0 \text{ \AA}$  and higher than  $2.5 \text{ \AA}$ . The potential was set zero at the distance between  $2.0 \text{ \AA}$  and  $2.5 \text{ \AA}$ .

### **Gas-phase MD simulation and calculation of theoretical collision cross-section (CCS) values.**

The 50 structures that were obtained from EOM were used as the initial structures for gas-phase MD simulation. For generation of the +8 charged  $\alpha\text{Syn}$ , all Lys residues and N-terminus were protonated, and C-terminus were deprotonated. Among Glu and Asp residues, 7 residues were selected and deprotonated. Then, MD simulation *in vacuo* at 300 K was performed for 20 ns using the 50 initial structures in solution. However, this charge assignment method does not generate the extended conformation of which theoretical CCS values ( $\text{CCS}_{\text{theo}} > 2500$ ). Instead, the structures of which  $\text{CCS}_{\text{theo}} > 2500$  in Supplementary Fig. 5, were generated using deprotonation of 8 acidic residues (Glu and Asp) and protonation of C-terminus. For the generation of the +8 charge state of four- $\text{Ca}^{2+}$ -bound  $\alpha\text{Syn}$  molecules, similarly, all Lys residues and N-terminus were protonated with two options: 1) deprotonation of C-terminus and 15 acidic residues, 2) protonation of C-terminus and deprotonation of 16 acidic residues. In order to describe binding of  $\text{Ca}^{2+}$  on the region 114-115 (ED), 119-123 (DPDNE), 130-131 (EE), and 137-139 (EPE), the neighboring two acidic residues per  $\text{Ca}^{2+}$  were deprotonated. MD simulation *in vacuo* was also performed in the same manner.  $\text{CCS}_{\text{theo}}$  values of the final structures were calculated using the exact hard sphere scattering (EHSS) method in MOBCAL.<sup>17</sup>

**Electrospray ionization-ion-mobility-mass spectrometry (ESI-IM-MS).** ESI-IM-MS was performed using a Waters Synapt G2 HDMS quadrupole traveling wave ion mobility (TWIM)

orthogonal time-of-flight mass spectrometer (Waters, Manchester, UK). 20  $\mu$ M  $\alpha$ Syn solutions in 20 mM ammonium acetate (pH 7.4) with increasing  $\text{CaCl}_2$  were prepared for the ESI-IM-MS experiments. The sample was introduced into an Au/Pd coated borosilicate emitter (Thermo), and sprayed into the nano-ESI source at flow rate of 0.2  $\mu$ L/min. The experiments were conducted at nano-ESI capillary voltage of 1.3 kV, cone voltage of 20 V, and source temperature of 50  $^\circ\text{C}$ . Helium cell gas flow and IMS cell gas ( $\text{N}_2$ ) flow were 150 mL/min and 60 mL/min, respectively. TWIM wave velocity and wave height were set to 500 m/s and 24 V, respectively. The experimental ion arrival times were converted into collision cross-section values by calibrating using denatured ubiquitin, cytochrome c, and apo-myoglobin whose collision cross-section values were previously reported.<sup>18,19</sup> To confirm binding of multiple  $\text{Ca}^{2+}$  ions to  $\alpha$ Syn, ESI-MS was performed again using another mass spectrometer, Agilent 6560 DTIMS-Q-TOF (Agilent Technologies, Santa Clara, CA, USA). The  $\alpha$ Syn solution was injected into the mass spectrometer at a flow rate of 3  $\mu$ L/min. The source temperature was 60  $^\circ\text{C}$ ; sheath gas temperature was 60  $^\circ\text{C}$ ; capillary voltage was 1.5 kV. Instead of  $\text{N}_2$ , He gas was introduced into the drift tube, and three radio frequency (RF) voltages (high-pressure funnel RF, trap funnel RF, and rear Funnel RF) were set to 100 V.

**Optical density measurements.** The incubated  $\alpha$ Syn samples (30  $\mu$ M) were transferred into a cuvette (Starna, CA, USA, cat. no. 16.40FQ-10), and the optical density at 600 nm (OD600) was measured using a Shimadzu UV-1800 spectrophotometer (Shimadzu, Kyoto, Japan).

**Inductively coupled plasma-optical emission spectroscopy (ICP-OES).** First, the residual  $\text{Ca}^{2+}$  concentration in 20 mM Tris-HCl was determined by using the standard addition method with ICP-OES. For the experiment, 20 mM Tris-HCl with different amounts of additional  $\text{CaCl}_2$  (0–1.6 mM) were prepared using 1 M Tris-HCl, HPLC water, and 1 M  $\text{CaCl}_2$  (of which the concentration



was determined through EDTA titration<sup>1</sup>). 40  $\mu\text{L}$  of each solution with different amounts of  $\text{Ca}^{2+}$  were diluted with 960  $\mu\text{L}$  of 20 mM Tris-HCl and 2 mL of HPLC water. Then, the intensity of  $\text{Ca}^{2+}$  emission line at 396.847 nm was measured by using ICP-OES (Agilent 730, Agilent Technologies, USA). Based on the linear correlation between the emission intensity and known added  $\text{Ca}^{2+}$  amount, and the assumption of trivial amount of  $\text{Ca}^{2+}$  in HPLC water, the residual  $\text{Ca}^{2+}$  concentration in 20 mM Tris-HCl buffer was determined (Supplementary Fig. 11A). In the same manner, the residual  $\text{Ca}^{2+}$  in 20 mM ammonium acetate and  $\alpha\text{Syn}$  (30  $\mu\text{M}$ )-dissolved Tris-HCl and ammonium acetate were determined (Supplementary Fig. 11B, C). Tris-HCl and ammonium acetate included  $2.3 \pm 0.5$  and  $2.5 \pm 0.1$   $\mu\text{M}$   $\text{Ca}^{2+}$  and  $\alpha\text{Syn}$  (30  $\mu\text{M}$ )-dissolved Tris-HCl and ammonium acetate included  $14.0 \pm 2.7$  and  $41.3 \pm 2.1$   $\mu\text{M}$   $\text{Ca}^{2+}$ , respectively (Supplementary Fig. 11C).

The linear relation function of the  $\text{Ca}^{2+}$  emission intensity of Tris-HCl with a different  $\text{Ca}^{2+}$  amount in Supplementary Fig. 11A was also used as a calibration curve to measure  $\text{Ca}^{2+}$  in the unknown samples, after the replacement of the values of the x-axis (the concentration increased by residual  $\text{Ca}^{2+}$ ) with the actual concentrations. For the quantitation of  $\text{Ca}^{2+}$  incorporated in the  $\alpha\text{Syn}$  aggregates formed through  $\text{Ca}^{2+}$  mediation (Fig. 5D), the sample was prepared by the following procedure. The  $\alpha\text{Syn}$  samples (40  $\mu\text{L}$ ) were collected and centrifuged at  $18,000 \times g$  for 20 min. After centrifugation, white pellets of  $\alpha\text{Syn}$  aggregates were observed on the bottom of tube. Then, the whole supernatant solution (40  $\mu\text{L}$ ) was aliquoted from the tube (tube #1). The remaining  $\alpha\text{Syn}$  aggregates on the tube bottom were dispersed using another 40  $\mu\text{L}$  of 20 mM Tris-HCl buffer (tube #2). Then, to each separate samples (tube #1 and #2), 10  $\mu\text{L}$  of 100 mM EDTA and 50  $\mu\text{L}$  of 16 M urea (Shinyo Chemical Co., Ltd, South Korea) were added (total volume of 100  $\mu\text{L}$ ). To denature  $\alpha\text{Syn}$  aggregates into monomers and extract  $\text{Ca}^{2+}$  from the aggregates, the

solutions were incubated at 95 °C for 20 min. Then, 900 µL of 20 mM Tris-HCl buffer was added, and filtered by using a 0.2 µm Whatman Puradisc syringe filter (Whatman International, Maidstone, Kent, UK, cat. no. 6784-1302). The filtration was performed to exclude the possibility of instrumental damage by dust or insoluble particles. By using the optical density measurements, we confirmed that all αSyn aggregates were disaggregated under high concentration of urea (~8 M) and heat-induced denaturation (~95 °C). Then the filtered solutions were finally diluted to 3 mL with HPLC water and their Ca<sup>2+</sup> emission intensities were measured. The intensities were converted to a concentration by using a calibration curve. For accurate measurement, we used the calibration curve that was obtained immediately prior to the sample analysis.

**Cell culture and MTT cytotoxic assay.** Human neuroblastoma cells (SH-SY5Y) were used for the cell toxicity assay. SH-SY5Y cells were grown in 1:1 mixture of Dulbecco's modified Eagle medium (DMEM) and Ham's F-12 medium (Welgene, Daegu, South Korea) supplemented with antibiotics and 10% fetal bovine serum, at 37 °C with 5% CO<sub>2</sub>. For the cytotoxicity assay, cells were plated in 96-well polystyrene plates with 2×10<sup>4</sup> cells per well (100 µL of medium). After incubation for 24 h at 37 °C, the medium was removed, and 100 µL of 6-fold diluted αSyn samples in fresh medium ([αSyn] = 5 µM) was added to each well. The plates were then incubated for an additional 24 h at 37 °C. Cell viability was determined using the methylthiazolyldiphenyl-tetrazolium bromide (MTT) toxicity assay with the addition of 10 µL of 5 mg/mL MTT (Sigma-Aldrich, St Louis, MO, USA), which was dissolved in phosphate buffered saline (PBS), to each well. After incubation for 3 h at 37 °C, the solution was removed, and 100 µL of dimethyl sulfoxide (DMSO) was added to each well. Then, the plate was gently agitated for 30 min in the dark to dissolve purple precipitates. The absorbance of each well was measured at 540 nm using a SpectraMax i3x microplate reader (Molecular Devices, Sunnyvale, CA, USA). Averages from 3

replicate wells were used for each sample and control. Cell viability was calculated by dividing the absorbance of the wells with that of the wells of Tris-HCl buffer-treated cells (control).

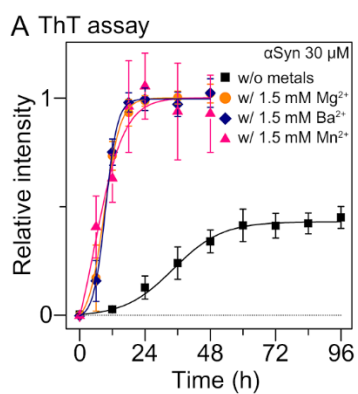

**Supplementary Figure 1.** ThT assay for the fibrillation kinetics of  $\alpha$ Syn (30  $\mu$ M) in the presence of 1.5 mM  $Mg^{2+}$ ,  $Ba^{2+}$ , and  $Mn^{2+}$ . For the sample preparation, concentrations of metal ions were determined by using an EDTA titration method<sup>1</sup>.

**A** Methods to measure the sedimentation degree

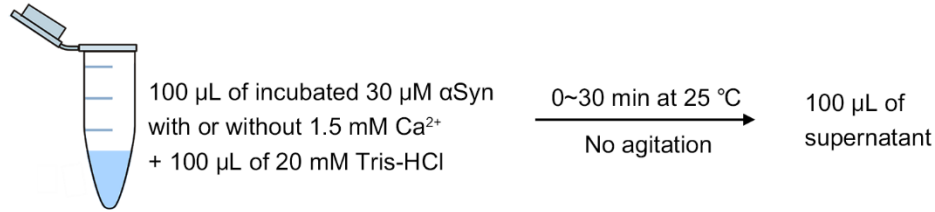

**B** Fibrils (formed without  $\text{Ca}^{2+}$ )

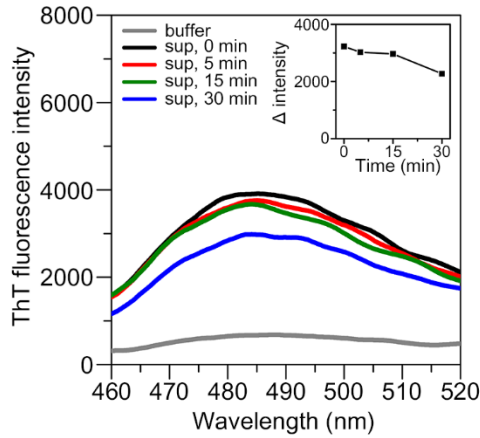

**C**  $\text{Ca}^{2+}$ -mediated aggregates

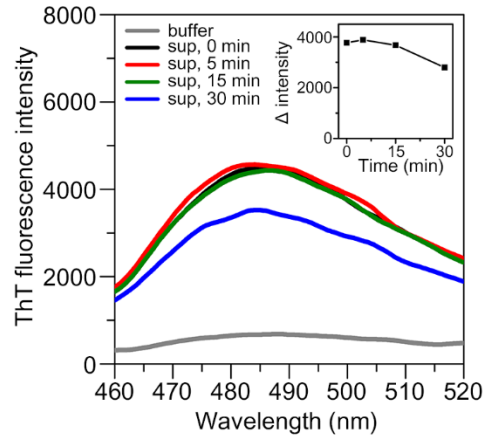

**D** Fibrils (formed without  $\text{Ca}^{2+}$ )

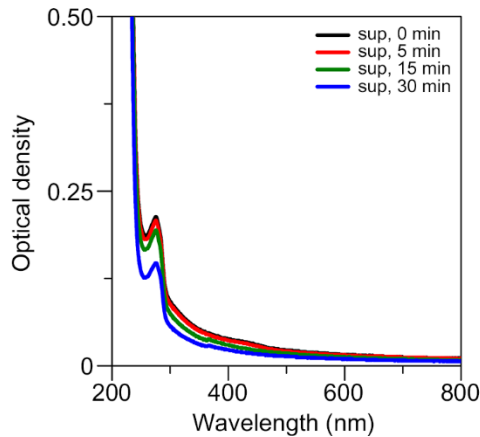

**E**  $\text{Ca}^{2+}$ -mediated aggregates

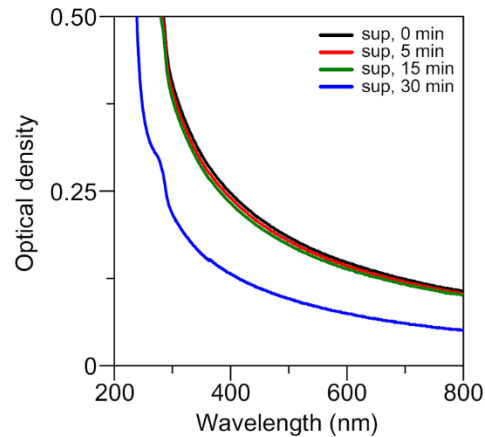

**Supplementary Figure 2.** Measurement of sedimentation degree of aggregates. A) Schematic diagram of the method used to measure the sedimentation of  $\alpha$ Syn aggregates. The ThT fluorescence assay results obtained using the supernatant of B) fibrils and C)  $\text{Ca}^{2+}$ -mediated aggregates. Optical density of the supernatant of D) fibrils and E)  $\text{Ca}^{2+}$ -mediated aggregates.

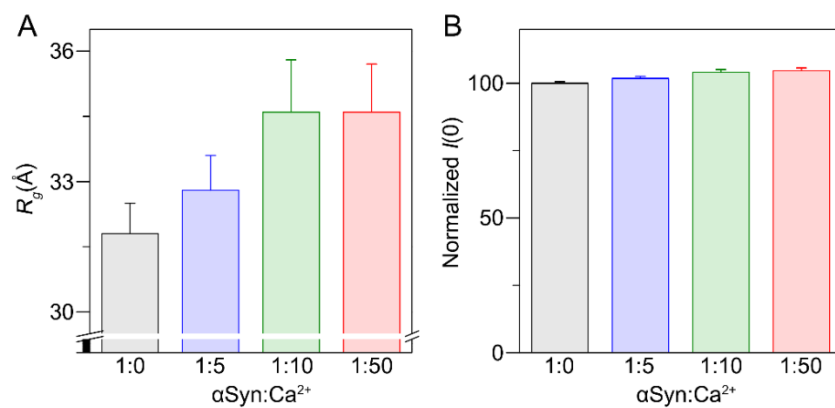

**Supplementary Figure 3.** SAXS results at various molar ratios of  $\alpha$ Syn (200  $\mu$ M) to Ca<sup>2+</sup>. A) Radius of gyration ( $R_g$ ) obtained using the Guinier analysis of SAXS scattering curves. B) Normalized  $I(0)$  values of the scattering curves used for the analysis. The  $I(0)$  value of  $\alpha$ Syn:Ca<sup>2+</sup>=1:0 was set as the standards for the comparison.

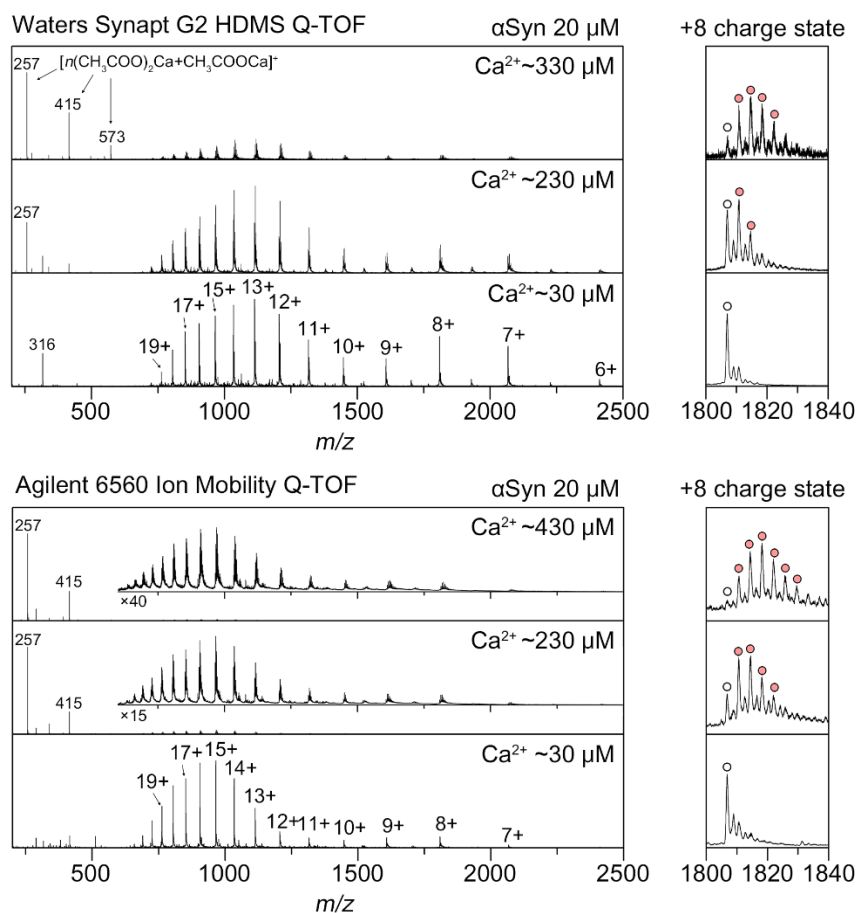

**Supplementary Figure 4.** ESI-MS spectra of  $\alpha$ Syn (20  $\mu$ M) with increasing  $\text{Ca}^{2+}$  concentrations. The spectra were obtained using Waters Synapt G2 HDMS Q-TOF and Agilent 6560 ion mobility Q-TOF mass spectrometers. The  $\alpha$ Syn in the +8 charge state was shown as a representative image. The  $\text{Ca}^{2+}$ -unbound and bound  $\alpha$ Syn peaks were marked with empty circles and filled circles, respectively. The peaks at  $m/z$  of 257, 415, and 573 correspond to calcium acetate cluster ions. With increasing  $\text{Ca}^{2+}$  concentration, the relative intensities of calcium acetate cluster ions increased and those of  $\alpha$ Syn ions decreased in both mass spectrometers. The relative intensities of  $\text{Ca}^{2+}$ -unbound and bound  $\alpha$ Syn ions were lowered by a  $[\text{Ca}^{2+}]$  of 330  $\mu$ M (Waters Synapt G2 HDMS) or 230  $\mu$ M (Agilent 6560) due to the high concentration of  $\text{Ca}^{2+}$ , which implied that the total ion concentrations were above the charge saturation concentrations for our ESI in our experimental conditions.<sup>20</sup>

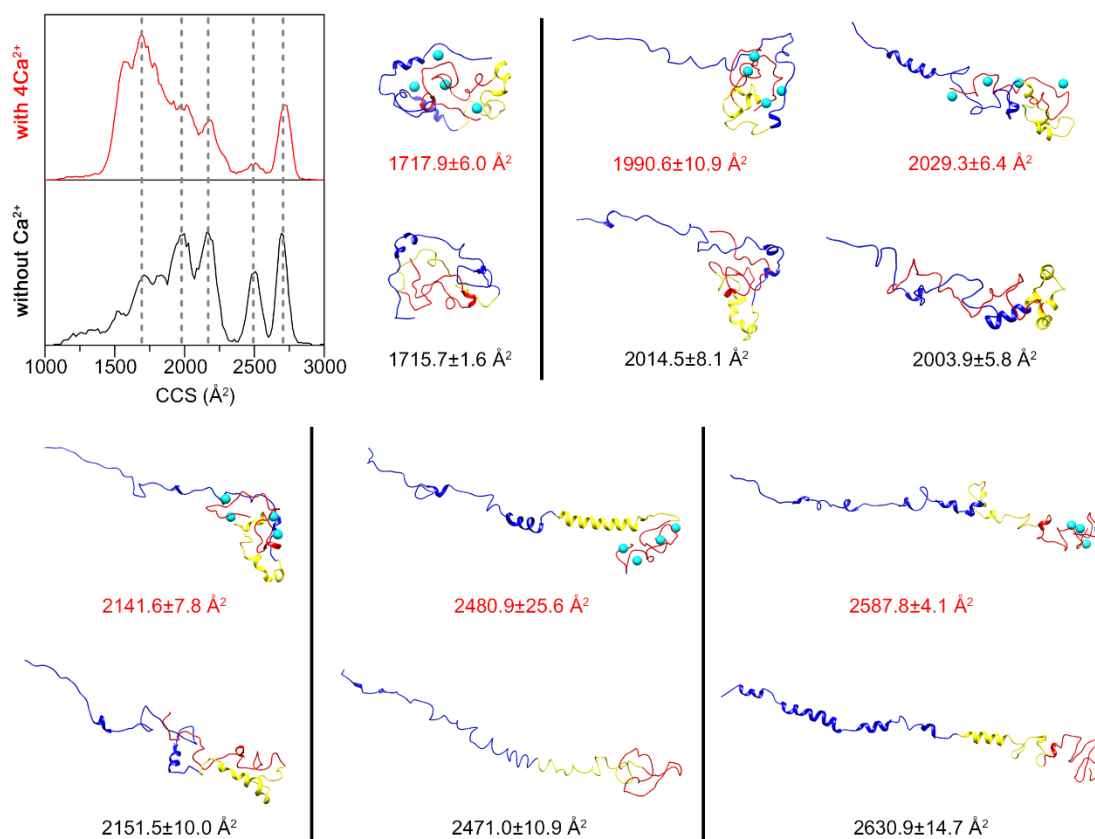

**Supplementary Figure 5.** Gas-phase structures of  $\alpha$ Syn (+8) and theoretical collision cross-section values for each structure. Residues in blue, yellow, and red indicate the N-terminal, non-amyloid- $\beta$  component (NAC), and C-terminal regions, respectively. Ca<sup>2+</sup> ions are in cyan.



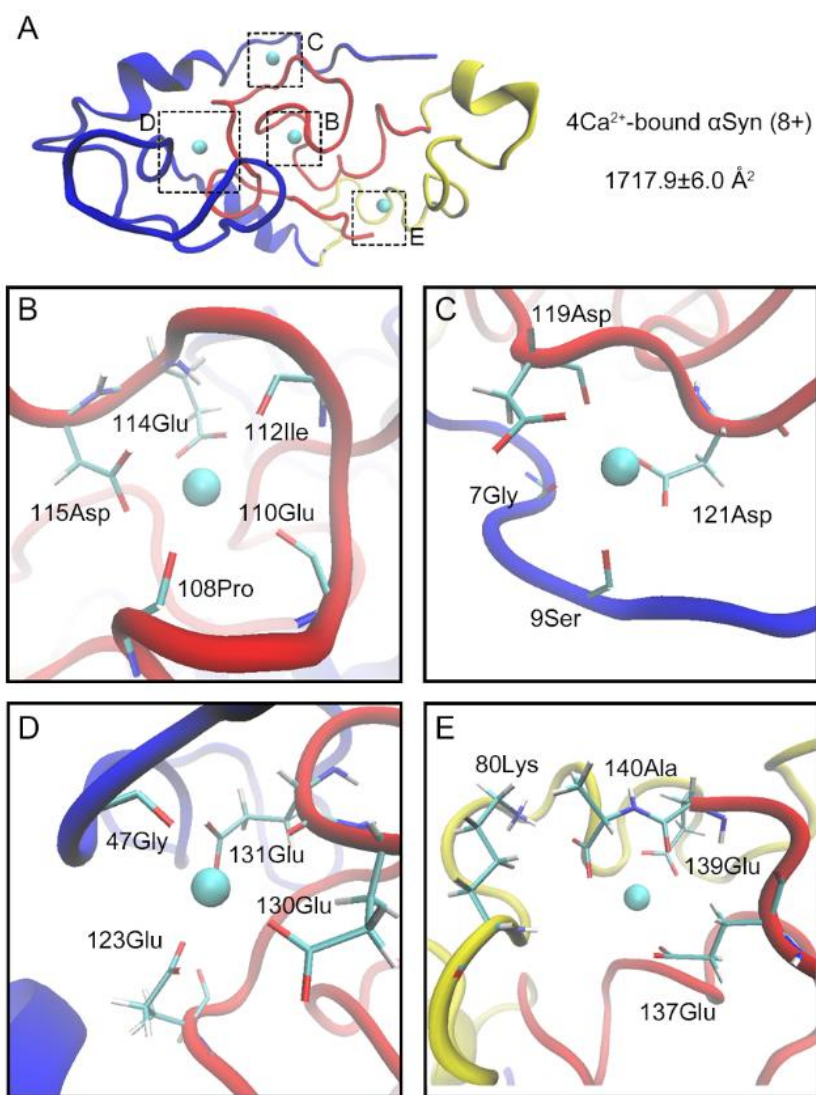

**Supplementary Figure 6.** Detailed gas-phase structure of 4 Ca<sup>2+</sup>-bound  $\alpha$ Syn (+8). Residues in blue, yellow, and red indicate the N-terminal, NAC, and C-terminal regions, respectively. Ca<sup>2+</sup> ions are in cyan. Residues whose backbones play important roles in Ca<sup>2+</sup> binding are illustrated with only their backbones.

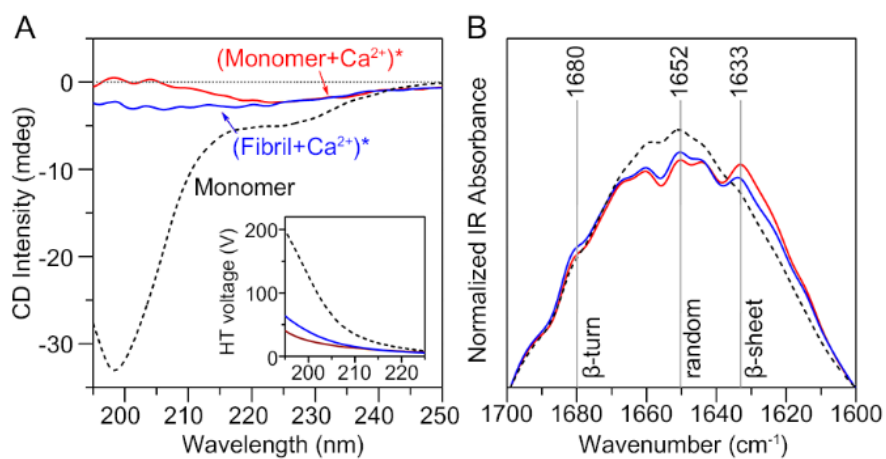

**Supplementary Figure 7.** Analysis of the secondary structures of  $\alpha$ Syn aggregates, which were formed by the incubation of mature  $\alpha$ Syn fibrils with  $\text{Ca}^{2+}$ . (\*) denotes the aggregates that were formed from the components enclosed within parentheses. A) CD spectra. B) IR spectra.

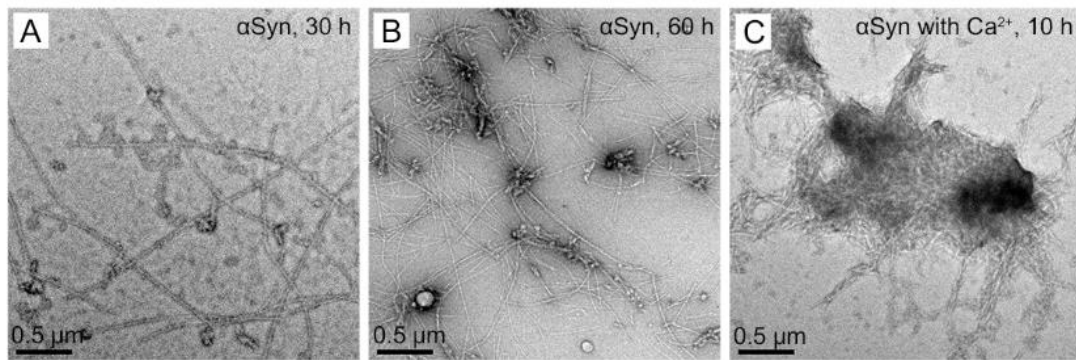

**Supplementary Figure 8.** TEM images of fibrils formed after A) 30 h and B) 60 h of the incubation of αSyn without Ca<sup>2+</sup>. C) TEM image of the aggregates formed after 10 h of the incubation of αSyn with Ca<sup>2+</sup>.

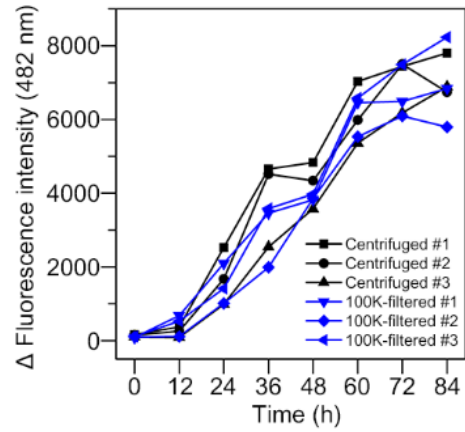

**Supplementary Figure 9.** ThT assay results of  $\alpha$ Syn (30  $\mu$ M) prepared following different sample preparation methods. Data points colored in black indicates  $\alpha$ Syn samples prepared from supernatant after centrifugation at 18,000 $\times$ g for 10 min. Data points colored in blue indicates  $\alpha$ Syn samples prepared from solution filtrated through 100K filter.

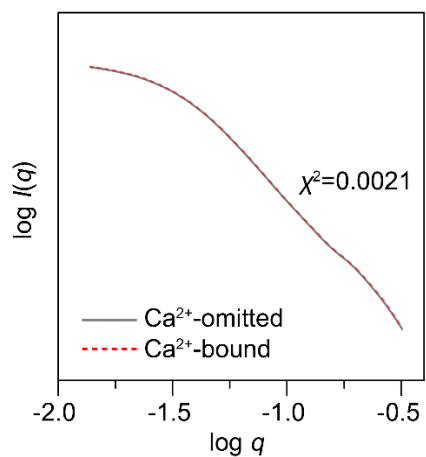

**Supplementary Figure 10.** Theoretical SAXS scattering profiles of  $\alpha$ Syn ensemble (50 different structures) obtained from the EOM analysis of SAXS scattering profiles of  $\alpha$ Syn with 50-fold  $\text{Ca}^{2+}$ , before and after the addition of four  $\text{Ca}^{2+}$  ions to the  $\alpha$ Syn structures, and subsequent geometry optimization.

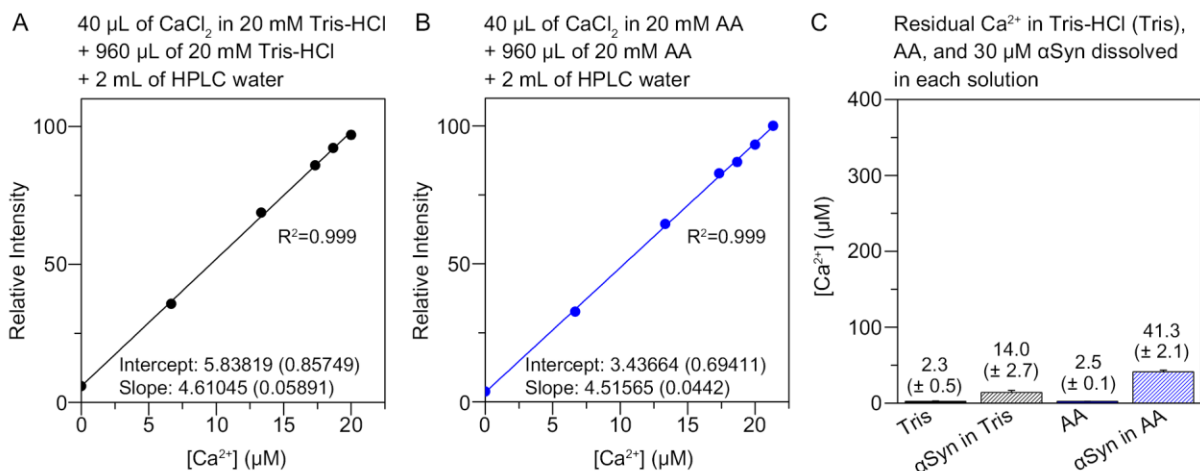

**Supplementary Figure 11.** Measurement of  $\text{Ca}^{2+}$  concentration by using ICP-OES. A) The measurement of residual  $\text{Ca}^{2+}$  in 20 mM Tris-HCl buffer by using the standard addition method. 40  $\mu\text{L}$  aliquots of 0.0–1.6 mM  $\text{CaCl}_2$  in 20 mM Tris buffer were diluted with 960  $\mu\text{L}$  of 20 mM Tris-HCl and 2 mL HPLC water. On the assumption that HPLC water included an insignificant amount of  $\text{Ca}^{2+}$ , the residual  $\text{Ca}^{2+}$  concentration in 20 mM Tris buffer was determined (as shown in panel C). Considering the residual  $\text{Ca}^{2+}$  in Tris buffer, the corrected linear fitted function was used to determine the  $\text{Ca}^{2+}$  concentration in Fig. 5D. B) The measurement of residual  $\text{Ca}^{2+}$  determined in 20 mM ammonium acetate using the standard addition method. C) The determined residual  $\text{Ca}^{2+}$  concentration in 20 mM Tris-HCl (Tris), 20 mM ammonium acetate (AA), and each solution, including 30  $\mu\text{M}$   $\alpha\text{Syn}$ .

## References

1. Frank, J.W. The analytical uses of ethylenediamine tetraacetic acid. *D. Van Nostrand Co. Inc. Princeton, New Jersey* (1958).
2. Putnam, C.D., Hammel, M., Hura, G.L. & Tainer, J.A. X-ray solution scattering (SAXS) combined with crystallography and computation: defining accurate macromolecular structures, conformations and assemblies in solution. *Q. Rev. Biophys.* **40**, 191–285 (2007).
3. Khalaf, O. et al. The H50Q mutation enhances  $\alpha$ -synuclein aggregation, secretion, and toxicity. *J. Biol. Chem.* **289**, 21856–21876 (2014).
4. Villar-Piqué, A. et al. Environmental and genetic factors support the dissociation between  $\alpha$ -synuclein aggregation and toxicity. *Proc. Nat. Acad. Sci. USA* **113**, E6506–E6515 (2016).
5. Choi, T.S., Lee, H.J., Han, J.Y., Lim, M.H. & Kim, H.I. Molecular insights into human serum albumin as a receptor of amyloid- $\beta$  in the extracellular region. *J. Am. Chem. Soc.* (2017).
6. Nielsen, L., Frokjaer, S., Brange, J., Uversky, V.N. & Fink, A.L. Probing the mechanism of insulin fibril formation with insulin mutants. *Biochemistry* **40**, 8397–8409 (2001).
7. Lee, C.-C., Nayak, A., Sethuraman, A., Belfort, G. & McRae, G.J. A three-stage kinetic model of amyloid fibrillation. *Biophys. J.* **92**, 3448–3458 (2007).
8. Mylonas, E. & Svergun, D.I. Accuracy of molecular mass determination of proteins in solution by small-angle X-ray scattering. *J. Appl. Cryst* **40**, s245–s249 (2007).
9. Hess, B., Kutzner, C., Van Der Spoel, D. & Lindahl, E. GROMACS 4: algorithms for highly efficient, load-balanced, and scalable molecular simulation. *J. Chem. Theory Comput.* **4**, 435–447 (2008).
10. Lindorff-Larsen, K. et al. Improved side-chain torsion potentials for the Amber ff99SB protein force field. *Proteins* **78**, 1950–1958 (2010).
11. MacKerell Jr, A.D. et al. All-atom empirical potential for molecular modeling and dynamics studies of proteins. *J. Phys. Chem. B* **102**, 3586–3616 (1998).
12. Onufriev, A., Bashford, D. & Case, D.A. Exploring protein native states and large-scale conformational changes with a modified generalized born model. *Proteins* **55**, 383–394 (2004).
13. Sugita, Y. & Okamoto, Y. Replica-exchange molecular dynamics method for protein folding. *Chem. Phys. Lett.* **314**, 141–151 (1999).
14. Bernadó, P., Mylonas, E., Petoukhov, M.V., Blackledge, M. & Svergun, D.I. Structural characterization of flexible proteins using small-angle X-ray scattering. *J. Am. Chem. Soc.* **129**, 5656–5664 (2007).
15. Tria, G., Mertens, H.D., Kachala, M. & Svergun, D.I. Advanced ensemble modelling of flexible macromolecules using X-ray solution scattering. *IUCrJ* **2**, 207–217 (2015).
16. Petoukhov, M.V. et al. New developments in the ATSAS program package for small-angle scattering data analysis. *J. Appl. Cryst* **45**, 342–350 (2012).
17. Mesleh, M., Hunter, J., Shvartsburg, A., Schatz, G.C. & Jarrold, M. Structural information from ion mobility measurements: effects of the long-range potential. *J. Phys. Chem.* **100**, 16082–16086 (1996).
18. Ruotolo, B.T., Benesch, J.L., Sandercock, A.M., Hyung, S.-J. & Robinson, C.V. Ion mobility–mass spectrometry analysis of large protein complexes. *Nat. Protoc.* **3**, 1139–1152 (2008).
19. Bush, M.F. et al. Collision cross sections of proteins and their complexes: a calibration framework and database for gas-phase structural biology. *Anal. Chem.* **82**, 9557–9565 (2010).
20. Cech, N.B. & Enke, C.G. Practical implications of some recent studies in electrospray ionization fundamentals. *Mass Spec. Rev.* **20**, 362–387 (2001).
